# Supplementary material for: SARS-CoV-2 Variants of Concern (VOC) Alpha, Beta, Gamma, Delta, and Omicron coincident with consecutive pandemic waves in Pakistan
Source: bioRxiv or medRxiv preprint supplement (doi:10.1101/2022.05.19.22275149), 2022-05-22

**Supplementary Figure 1. The timeline and screening workflow of the PCR assays.** The introduction of the PCR assays between April 2021 and February 2022

| Month/Year     | Novatype SARS-CoV-2, Gold Standard Diagnostics, Eurofins Technologies | Novatype II SARS-CoV-2, Gold Standard Diagnostics, Eurofins Technologies | PhoenixDx SARS-CoV-2 Mutant Screen [L452R], Promocure Biotech GmbH | NovaType Select P68IR SARS-CoV-2, Gold Standard Diagnostics, Eurofins Technologies | Novatype III SARS-CoV-2, Gold Standard Diagnostics, Eurofins Technologies | TaqPath™ COVID-19 CE-IVD RT-PCR Kit by Applied Biosystems |
|----------------|-----------------------------------------------------------------------|--------------------------------------------------------------------------|--------------------------------------------------------------------|------------------------------------------------------------------------------------|---------------------------------------------------------------------------|-----------------------------------------------------------|
| April 2021     |                                                                       |                                                                          |                                                                    |                                                                                    |                                                                           |                                                           |
| May 2021       |                                                                       |                                                                          |                                                                    |                                                                                    |                                                                           |                                                           |
| June 2021      |                                                                       |                                                                          |                                                                    |                                                                                    |                                                                           |                                                           |
| July 2021      |                                                                       |                                                                          |                                                                    |                                                                                    |                                                                           |                                                           |
| August 2021    |                                                                       |                                                                          |                                                                    |                                                                                    |                                                                           |                                                           |
| September 2021 |                                                                       |                                                                          |                                                                    |                                                                                    |                                                                           |                                                           |
| October 2021   |                                                                       |                                                                          |                                                                    |                                                                                    |                                                                           |                                                           |
| November 2021  |                                                                       |                                                                          |                                                                    |                                                                                    |                                                                           |                                                           |
| December 2021  |                                                                       |                                                                          |                                                                    |                                                                                    |                                                                           |                                                           |
| January 2022   |                                                                       |                                                                          |                                                                    |                                                                                    |                                                                           |                                                           |
| February 2022  |                                                                       |                                                                          |                                                                    |                                                                                    |                                                                           |                                                           |

**Supplementary Figure 2. Workflow of PCR assays utilized**

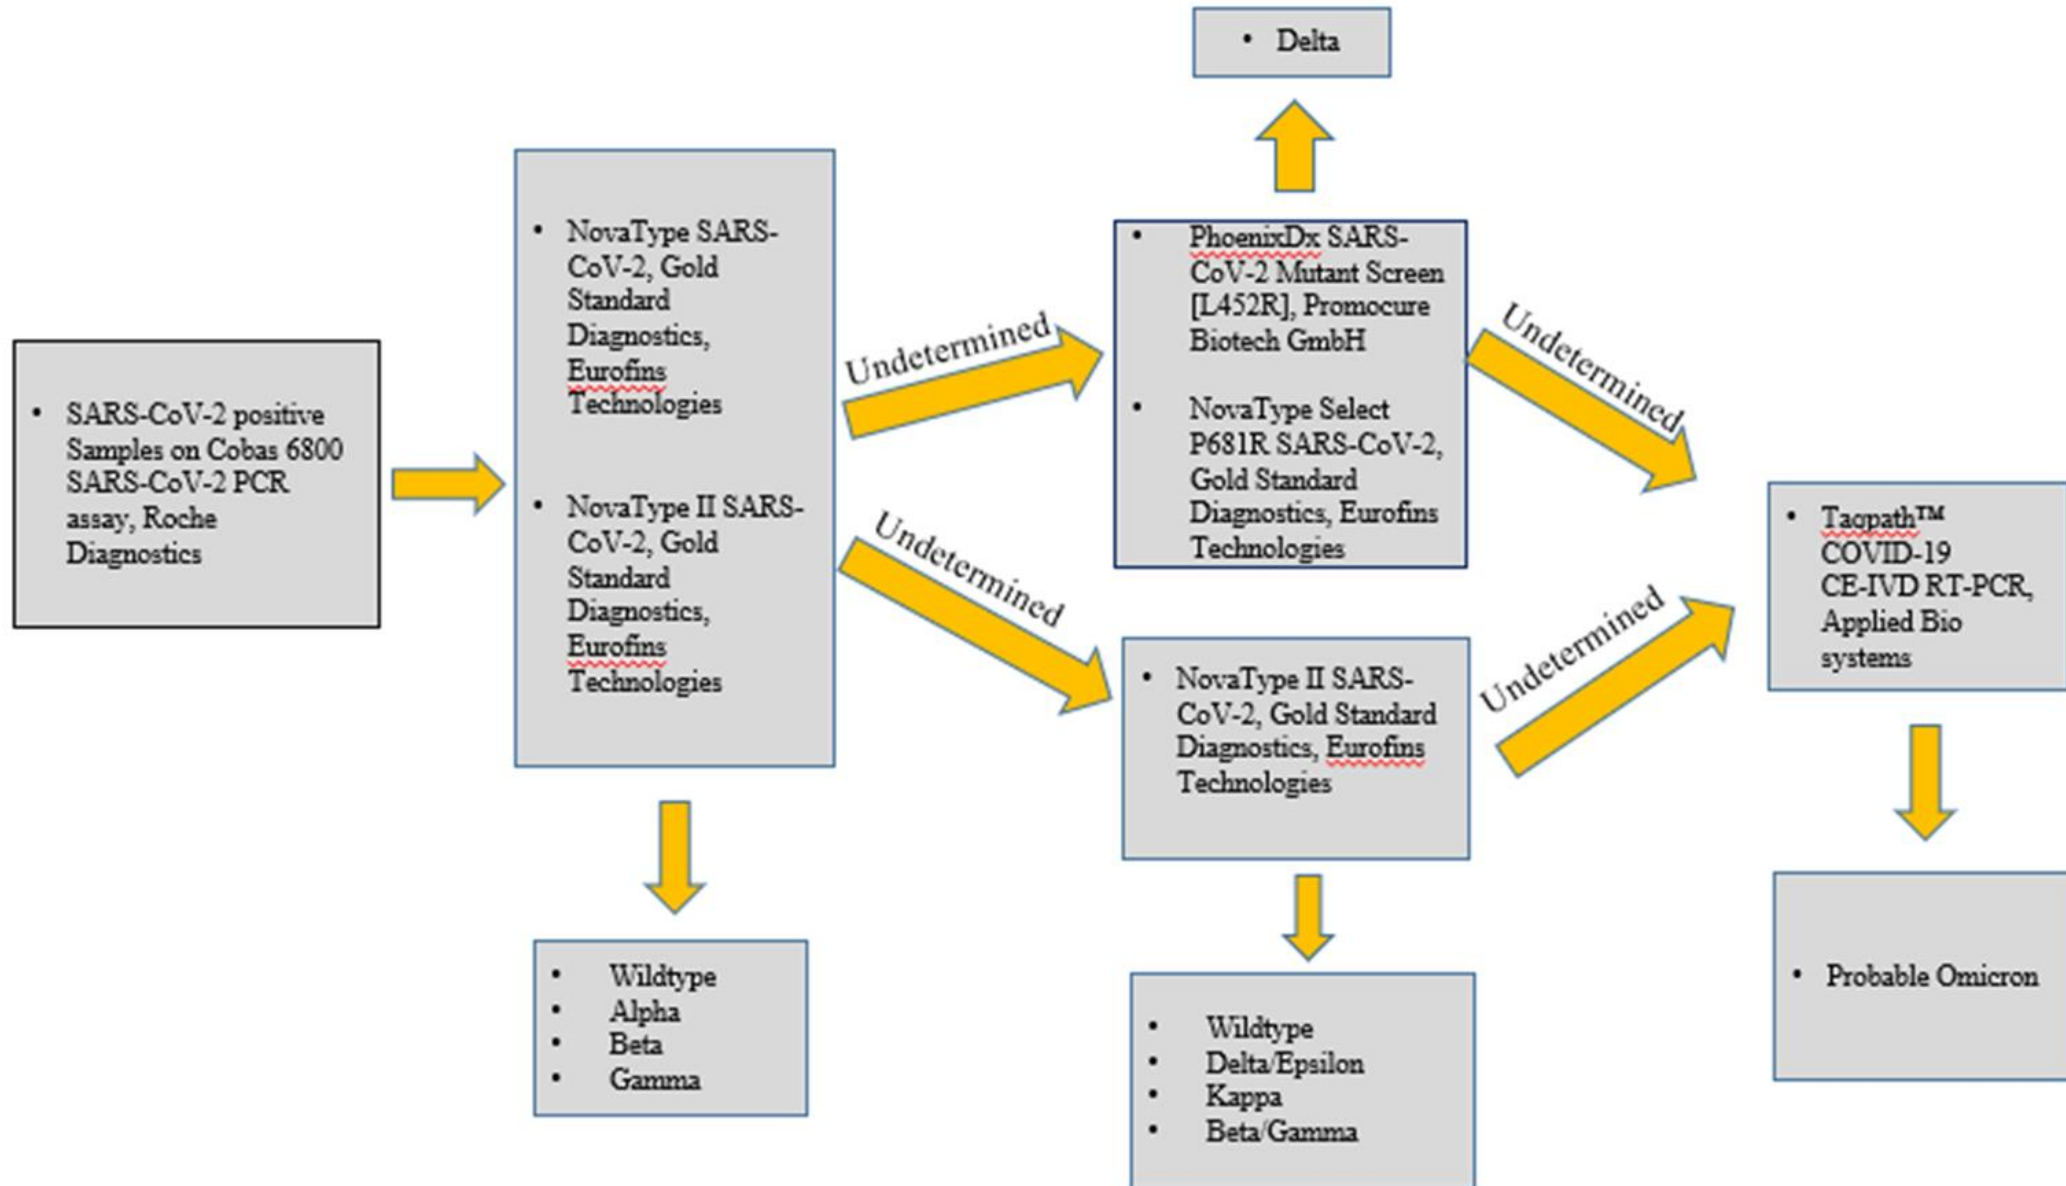

**Supplementary Figure 3. Number of COVID19 positive cases in Pakistan.** Data presented is for the COVID-19 positive cases in Pakistan between months April 2021 till February 2022. Source, John Hopkins, Corona Research Center <https://coronavirus.jhu.edu/region/pakistan>

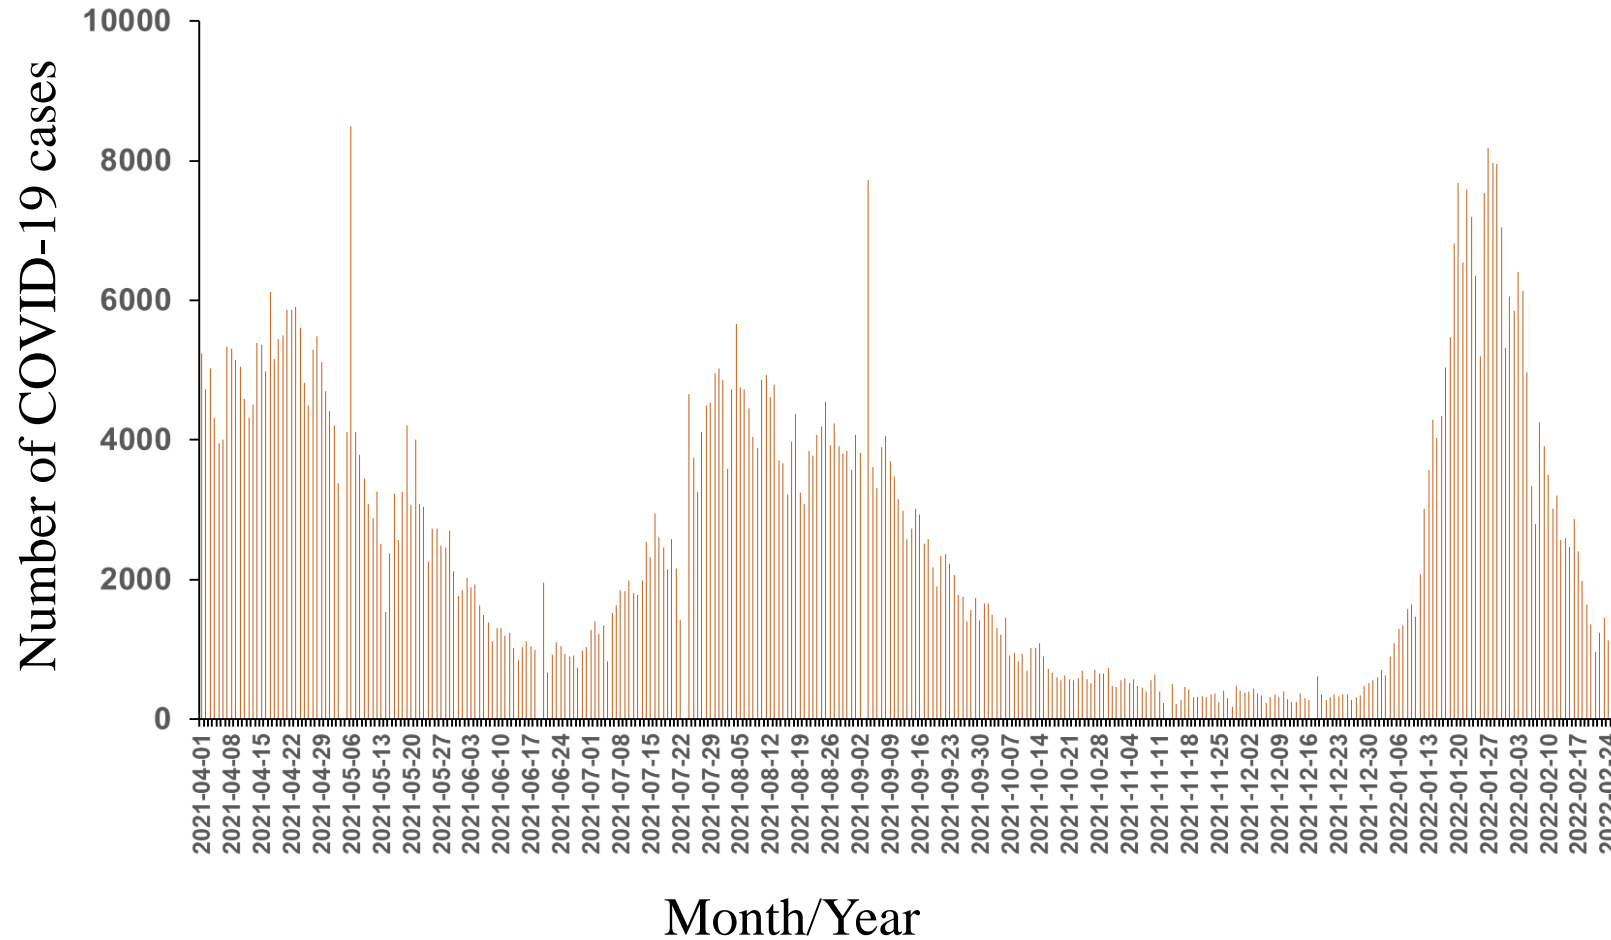

**Supplementary Figure 4. Number of COVID19 related deaths in Pakistan.** Data presented is for the COVID-19 related deaths in Pakistan between months April 2021 till February 2022 Source, John Hopkins, Corona Research Center <https://coronavirus.jhu.edu/region/pakistan>

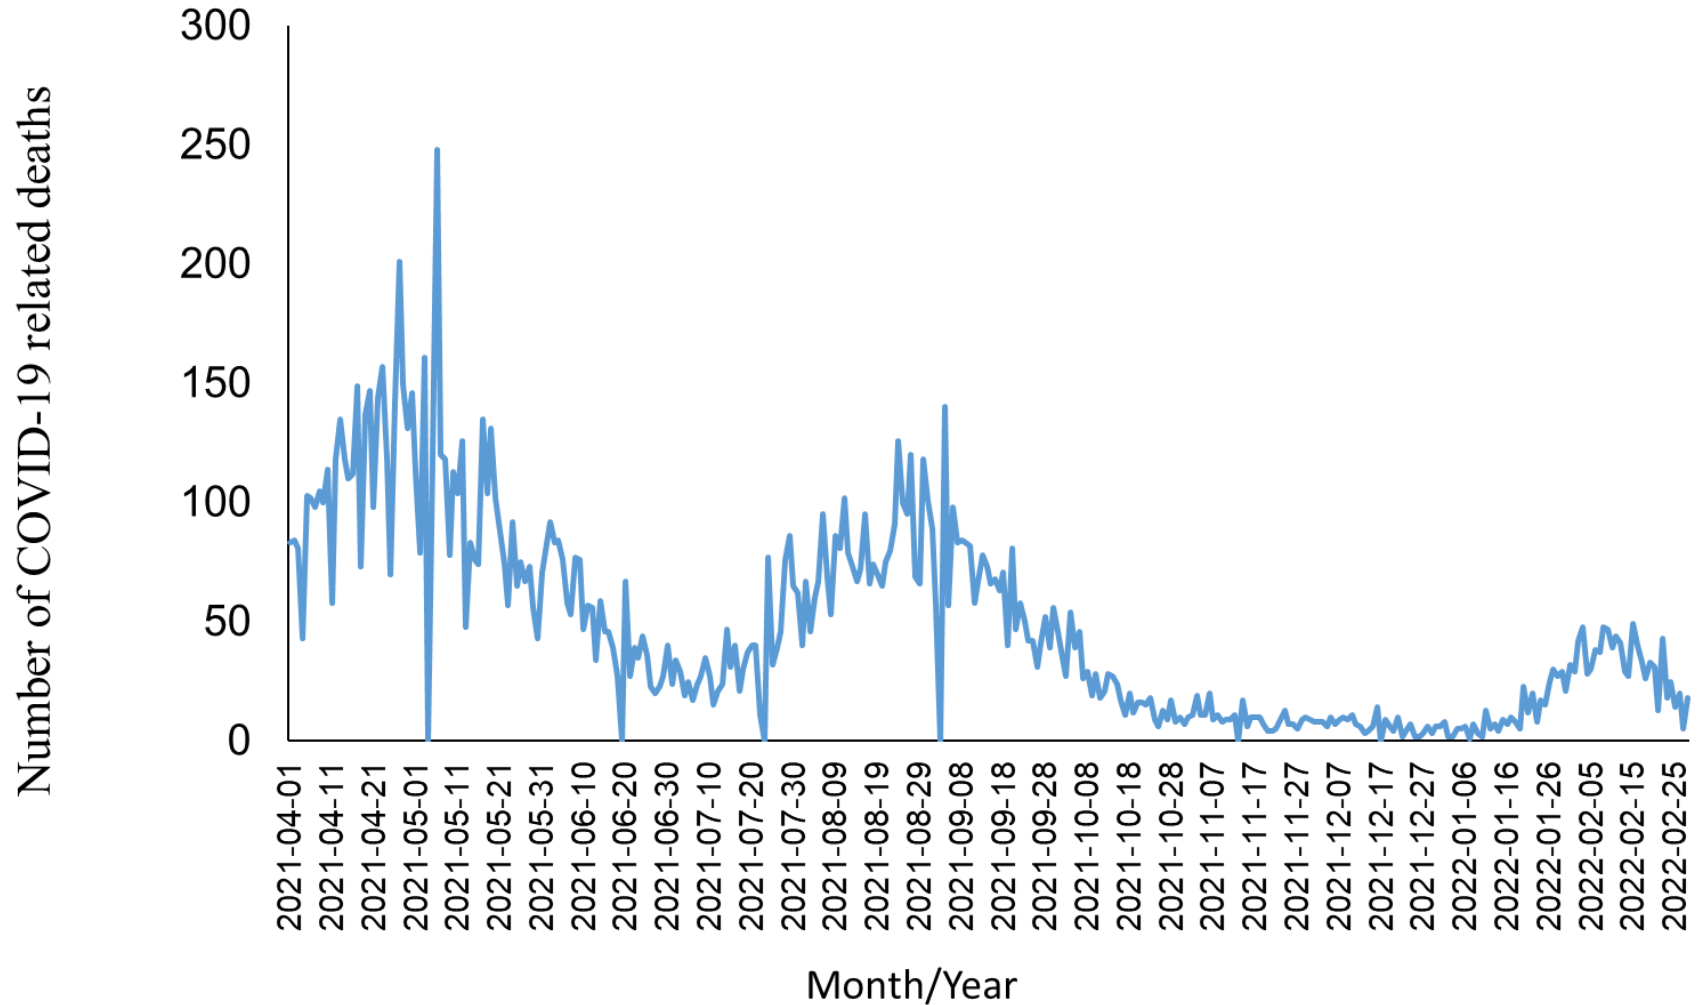

Supplement: Supplementary file [file media-1.pdf]
