# Supplementary material for: SARS-CoV-2 Variants of Concern (VOC) Alpha, Beta, Gamma, Delta, and Omicron coincident with consecutive pandemic waves in Pakistan
Source: bioRxiv or medRxiv preprint supplement (doi:10.1101/2022.05.19.22275149), 2022-05-22
Supplement: Supplementary file [file media-2.pdf]

| VOC     | strain     | virus           | gisaid_epi_isl   | date   | region | country  |
|---------|------------|-----------------|------------------|--------|--------|----------|
| Omicron | hCoV-19/P. | betacoronavirus | EPI_ISL_10633680 | Jan-22 | Asia   | Pakistan |
| Omicron | hCoV-19/P. | betacoronavirus | EPI_ISL_10633681 | Jan-22 | Asia   | Pakistan |
| Alpha   | hCoV-19/P. | betacoronavirus | EPI_ISL_10774011 | Apr-21 | Asia   | Pakistan |
| Alpha   | hCoV-19/P. | betacoronavirus | EPI_ISL_10774012 | Apr-21 | Asia   | Pakistan |
| Alpha   | hCoV-19/P. | betacoronavirus | EPI_ISL_10774013 | May-21 | Asia   | Pakistan |
| Beta    | hCoV-19/P. | betacoronavirus | EPI_ISL_10774014 | May-21 | Asia   | Pakistan |
| Beta    | hCoV-19/P. | betacoronavirus | EPI_ISL_10774015 | May-21 | Asia   | Pakistan |
| Omicron | hCoV-19/P. | betacoronavirus | EPI_ISL_10774019 | Jan-22 | Asia   | Pakistan |
| Alpha   | hCoV-19/P. | betacoronavirus | EPI_ISL_10813368 | Jan-22 | Asia   | Pakistan |
| Delta   | hCoV-19/P. | betacoronavirus | EPI_ISL_10813369 | Dec-21 | Asia   | Pakistan |
| Delta   | hCoV-19/P. | betacoronavirus | EPI_ISL_11993245 | Jul-21 | Asia   | Pakistan |
| Delta   | hCoV-19/P. | betacoronavirus | EPI_ISL_11993246 | Dec-21 | Asia   | Pakistan |
| Beta    | hCoV-19/P. | betacoronavirus | EPI_ISL_9861904  | Jun-21 | Asia   | Pakistan |
| Delta   | hCoV-19/P. | betacoronavirus | EPI_ISL_9861906  | Jun-21 | Asia   | Pakistan |
| Alpha   | hCoV-19/P. | betacoronavirus | EPI_ISL_9861908  | Jun-21 | Asia   | Pakistan |
| Delta   | hCoV-19/P. | betacoronavirus | EPI_ISL_9861909  | Jun-21 | Asia   | Pakistan |
| Alpha   | hCoV-19/P. | betacoronavirus | EPI_ISL_9861910  | Jun-21 | Asia   | Pakistan |
| Beta    | hCoV-19/P. | betacoronavirus | EPI_ISL_9861911  | Jun-21 | Asia   | Pakistan |

| region_exp | country_exp | segment | length | host  | age   | sex    | pangolin_lineage |
|------------|-------------|---------|--------|-------|-------|--------|------------------|
| Asia       | Pakistan    | genome  | 29802  | Human | 31-40 | Male   | BA.1.1           |
| Asia       | Pakistan    | genome  | 29740  | Human | 21-30 | Male   | BA.1.1           |
| Asia       | Pakistan    | genome  | 29818  | Human | 71-80 | Male   | B.1.1.7          |
| Asia       | Pakistan    | genome  | 29796  | Human | 71-80 | Male   | B.1.1.7          |
| Asia       | Pakistan    | genome  | 29801  | Human | 11-20 | Male   | B.1.1.7          |
| Asia       | Pakistan    | genome  | 29821  | Human | >81   | Male   | B.1.351          |
| Asia       | Pakistan    | genome  | 29804  | Human | 21-30 | Male   | B.1.351          |
| Asia       | Pakistan    | genome  | 29777  | Human | 61-70 | Male   | BA.1.1           |
| Asia       | Pakistan    | genome  | 29520  | Human | 21-30 | Female | BA.1.17          |
| Asia       | Pakistan    | genome  | 29473  | Human | 51-60 | Male   | B.1.617.2        |
| Asia       | Pakistan    | genome  | 29798  | Human | 61-70 | Male   | B.1.617.2        |
| Asia       | Pakistan    | genome  | 29790  | Human | 21-30 | Male   | B.1.617.2        |
| Asia       | Pakistan    | genome  | 29736  | Human | 21-30 | Male   | B.1.351          |
| Asia       | Pakistan    | genome  | 29750  | Human | 11-20 | Male   | B.1.617.2        |
| Asia       | Pakistan    | genome  | 29772  | Human | 21-30 | Male   | B.1.1.7          |
| Asia       | Pakistan    | genome  | 29457  | Human | 71-80 | Male   | B.1.617.2        |
| Asia       | Pakistan    | genome  | 28956  | Human | 31-40 | Male   | B.1.1.7          |
| Asia       | Pakistan    | genome  | 29767  | Human | 21-30 | Female | B.1.351          |

| GISAID_clade | originating_lab      | submitting_lab          | authors                       |
|--------------|----------------------|-------------------------|-------------------------------|
| GRA          | Department of Pathol | Department of Pathology | A.R. Bukhari, A. Nasir, A. Ka |
| GRA          | Department of Pathol | Department of Pathology | A.R. Bukhari, A. Nasir, A. Ka |
| GR           | Department of Pathol | Department of Pathology | A.R. Bukhari, A. Nasir, A. Ka |
| GRY          | Department of Pathol | Department of Pathology | A.R. Bukhari, A. Nasir, A. Ka |
| GRY          | Department of Pathol | Department of Pathology | A.R. Bukhari, A. Nasir, A. Ka |
| GH           | Department of Pathol | Department of Pathology | A.R. Bukhari, A. Nasir, A. Ka |
| GH           | Department of Pathol | Department of Pathology | A.R. Bukhari, A. Nasir, A. Ka |
| GRA          | Department of Pathol | Department of Pathology | A.R. Bukhari, A. Nasir, A. Ka |
| GRA          | Department of Pathol | Department of Pathology | A.R. Bukhari, A. Nasir, A. Ka |
| GK           | Department of Pathol | Department of Pathology | A.R. Bukhari, A. Nasir, A. Ka |
| GK           | Department of Pathol | Department of Pathology | A. Kanji, A.R. Bukhari, A. Na |
| GK           | Department of Pathol | Department of Pathology | A. Kanji, A.R. Bukhari, A. Na |
| GH           | Department of Pathol | Department of Pathology | A.R. Bukhari, A. Nasir, A. Ka |
| GK           | Department of Pathol | Department of Pathology | A.R. Bukhari, A. Nasir, A. Ka |
| G            | Department of Pathol | Department of Pathology | A.R. Bukhari, A. Nasir, A. Ka |
| GK           | Department of Pathol | Department of Pathology | A.R. Bukhari, A. Nasir, A. Ka |
| G            | Department of Pathol | Department of Pathology | A.R. Bukhari, A. Nasir, A. Ka |
| GH           | Department of Pathol | Department of Pathology | A.R. Bukhari, A. Nasir, A. Ka |
